# Supplementary material for: Isolation and Identification of a TaTDR-Like Wheat Gene Encoding a bHLH Domain Protein, Which Negatively Regulates Chlorophyll Biosynthesis in Arabidopsis
Source: MDPI journal article supplement (doi:10.3390/ijms21020629), 2020-01-17
Supplement: s1 [file s1]

## Supplementary Table S2:

**Table S2.** Cis-elements in the upstream regulation region of *TaTDRL* gene.

| Associated putative function          | Cis-elements in the promoter region                                                           |
|---------------------------------------|-----------------------------------------------------------------------------------------------|
| Absciscic acid responsiveness         | ABRE                                                                                          |
| salicylic responsiveness              | TCA-element                                                                                   |
| MeJA-responsiveness                   | CGTCA-motif, TGACG-motif                                                                      |
| Gibberellin-responsive                | GARE-motif                                                                                    |
| Essential for the anaerobic induction | ARE                                                                                           |
| Auxin responsiveness                  | AuxRR-core                                                                                    |
| Meristem expression                   | CAT-box                                                                                       |
| MYBHv1 binding site                   | CCAAT-box                                                                                     |
| Anoxic specific inducibility          | GC-motif                                                                                      |
| Low-temperature responsiveness        | LTR                                                                                           |
| drought-inducibility                  | MBS                                                                                           |
| Zein metabolism regulation            | O <sub>2</sub> -site                                                                          |
| Seed-specific regulation              | RY-element                                                                                    |
| Light responsive element              | AE-box, Box4, GATA-motif, GT1-motif, GTGGC-motif, L-box, Sp1 (3), TCT-motif, G-box (5), G-Box |
