# Supplementary material for: Isolation and Identification of a TaTDR-Like Wheat Gene Encoding a bHLH Domain Protein, Which Negatively Regulates Chlorophyll Biosynthesis in Arabidopsis
Source: MDPI journal article supplement (doi:10.3390/ijms21020629), 2020-01-17
Supplement: s1 [file s1]

## Supplementary Table S1:

**Table S1.** The primers used in the study.

### Primers for amplifying the TaTDRL

| Primer Name | Primer Sequence              |
|-------------|------------------------------|
| TaTDRL-P1-F | 5'-ATGGGAGGAGGAGATTATCACC-3' |
| TaTDRL-P1-R | 5'-TCAATCCATGGCGAGGTACTGC-3' |
| TaTDRL-P2-F | 5'-CAATTAGGCACTTGCATTTCTG-3' |
| TaTDRL-P2-R | 5'-GAAACACTTTTCGGTAGTGATG-3' |

### Primers for real-time PCR

| Primer Name   | Primer Sequence               |
|---------------|-------------------------------|
| TaActin-F     | 5'-TGTTGTTCTCAGTGGAGGTTCT-3'  |
| TaActin-R     | 5'-CTGTATTTCTTTTCAGGTGGTG-3'  |
| TaTDRL-qpcr-F | 5'-CAACGACCGCCTCTACAAG-3'     |
| TaTDRL-qpcr-R | 5'-GCTCCTTCACCTGCTTCTG-3'     |
| AtActin-F     | 5'-GGTAACATTGTGCTCAGTGGTGG-3' |
| AtActin-R     | 5'-AACGACCTTAATCTTCATGCTGC-3' |
| AtPORC-qpcr-F | 5'-TTAGCAGACACAGGGAAATGG-3'   |
| AtPORC-qpcr-R | 5'-CAAGCGAAGCAAGATCAAGATG-3'  |

### Primers for transcriptional activation in the yeast GAL4 system

| Primer name     | Primer sequence                                |
|-----------------|------------------------------------------------|
| TaTDRL-BD-F     | 5'-GCCATGGAGGCCGAATTCATGGGAGGAGGAGATTATCACC-3' |
| TaTDRL-BD-R     | 5'-CGGCCGCTGCAGGTGCACTCAATCCATGGCGAGGTACTGC-3' |
| TaTDRL-NBD-F    | 5'-GCCATGGAGGCCGAATTCATGGGAGGAGGAGATTATCACC-3' |
| TaTDRL-NBD-R    | 5'-CGGCCGCTGCAGGTGCACTTCTTGCACTGCTGCCGCTTC-3'  |
| TaTDRL-HLHBD-F  | 5'-GCCATGGAGGCCGAATTCCTCGAGGCGGAGCGGAAGCGGC-3' |
| TaTDRL-HLHBD-R  | 5'-CGGCCGCTGCAGGTGCACTCCTTCACCTGCTTCTGCAGC-3'  |
| TaTDRL-CBD-F    | 5'-GCCATGGAGGCCGAATTCCTGCAGGACGAGCTGGAGGACC-3' |
| TaTDRL-CBD-R    | 5'-CGGCCGCTGCAGGTGCACTCAATCCATGGCGAGGTACTGC-3' |
| TaTDRL-NHLHBD-F | 5'-GCCATGGAGGCCGAATTCATGGGAGGAGGAGATTATCACC-3' |
| TaTDRL-NHLHBD-R | 5'-CGGCCGCTGCAGGTGCACTCCTTCACCTGCTTCTGCAGC-3'  |
| TaTDRL-HLHCBD-F | 5'-GCCATGGAGGCCGAATTCCTCGAGGCGGAGCGGAAGCGGC-3' |
| TaTDRL-HLHCBD-R | 5'-CGGCCGCTGCAGGTGCACTCAATCCATGGCGAGGTACTGC-3' |
| TaTDRL-EGFP-F   | 5'-CGAGCTCAAGCTTCGAAATGGGAGGAGGAGATTATCACC-3'  |
| TaTDRL-EGFP-R   | 5'-CGACTGCAGAATTCGAAATCCATGGCGAGGTACTGCAG-3'   |

### Primers for yeast two-hybrid

| Primer name | Primer sequence |
|-------------|-----------------|
|-------------|-----------------|

|              |                                                  |
|--------------|--------------------------------------------------|
| TaPIF1-AD-F  | 5'-CCATGGAGGCCAGTGAATTCATGAGCCAATTCGTGCCAGATT-3' |
| TaPIF1-AD-R  | 5'-AGCTCGAGCTCGATGGATCCTCATCTTTGTTTGGGTGTATC-3'  |
| AtPIF1-AD-F  | 5'-CCATGGAGGCCAGTGAATTCATGCATCATTTTGTCCCTGACT-3' |
| AtPIF1-AD-R  | 5'-AGCTCGAGCTCGATGGATCCTTAACCTGTTGTGTGGTTTCCG-3' |
| TaTDRL-CBD-F | 5'-GCCATGGAGGCCGAATTCCTGCAGGACGAGCTGGAGGACC-3'   |
| TaTDRL-CBD-R | 5'-CGGCCGCTGCAGGTCGACTCAATCCATGGCGAGGTACTGC-3'   |

Primers for bimolecular fluorescence complementation assays

| Primer name    | Primer sequence                               |
|----------------|-----------------------------------------------|
| AtPIF1-cEYFP-F | 5'-CGAGCTCAAGCTTCGAAATGCATCATTTTGTCCCTGACT-3' |
| AtPIF1-cEYFP-R | 5'-CGACTGCAGAATTCGAATTAACCTGTTGTGTGGTTTCCG-3' |
| TaPIF1-cEYFP-F | 5'-CGAGCTCAAGCTTCGAAATGAGCCAATTCGTGCCAGATT-3' |
| TaPIF1-cEYFP-R | 5'-CGACTGCAGAATTCGAATCATCTTTGTTTGGGTGTATC-3'  |
| TaTDRL-nEYFP-F | 5'-CGAGCTCAAGCTTCGAAATGGGAGGAGGAGATTATCACC-3' |
| TaTDRL-nEYFP-R | 5'-CGACTGCAGAATTCGAATCCATGGCGAGGTACTGCAG-3'   |

For construction of a transgene vector

| Primer name  | Primer sequence                                                                    |
|--------------|------------------------------------------------------------------------------------|
| TaTDRL-OE-F  | 5'-GGGGACTCTTGACCATGGAGATGGGAGGAGGAGATTAT-3'                                       |
| TaTDRL-OE-R  | 5'-TTCTTCTCCTTTACTAGTTTACTTATCGTCGTCATCCTTGTAATCATCCATGG<br>CGAGGTA-3'             |
| TaTDRL-EAR-F | 5'-GGGGACTCTTGACCATGGAGATGGGAGGAGGAGATTAT-3'                                       |
| TaTDRL-EAR-R | 5'-TTCTTCTCCTTTACTAGTTTAAGCGAAACCCAAACGGAGTTCTAGATCCA<br>GATCCAGATCCATGGCGAGGTA-3' |
